# Supplementary material for: Disability and the risk of subsequent mortality in elderly: a 12-year longitudinal population-based study
Source: Springer Nature journal article supplement (doi:10.1186/s12877-021-02611-1), 2021-11-23

**Title: Disability and the risk of subsequent mortality in elderly: A 12-year longitudinal population-based study**

Supplement Figure S1: The Kaplan-Meier survival curve by age group and disability status

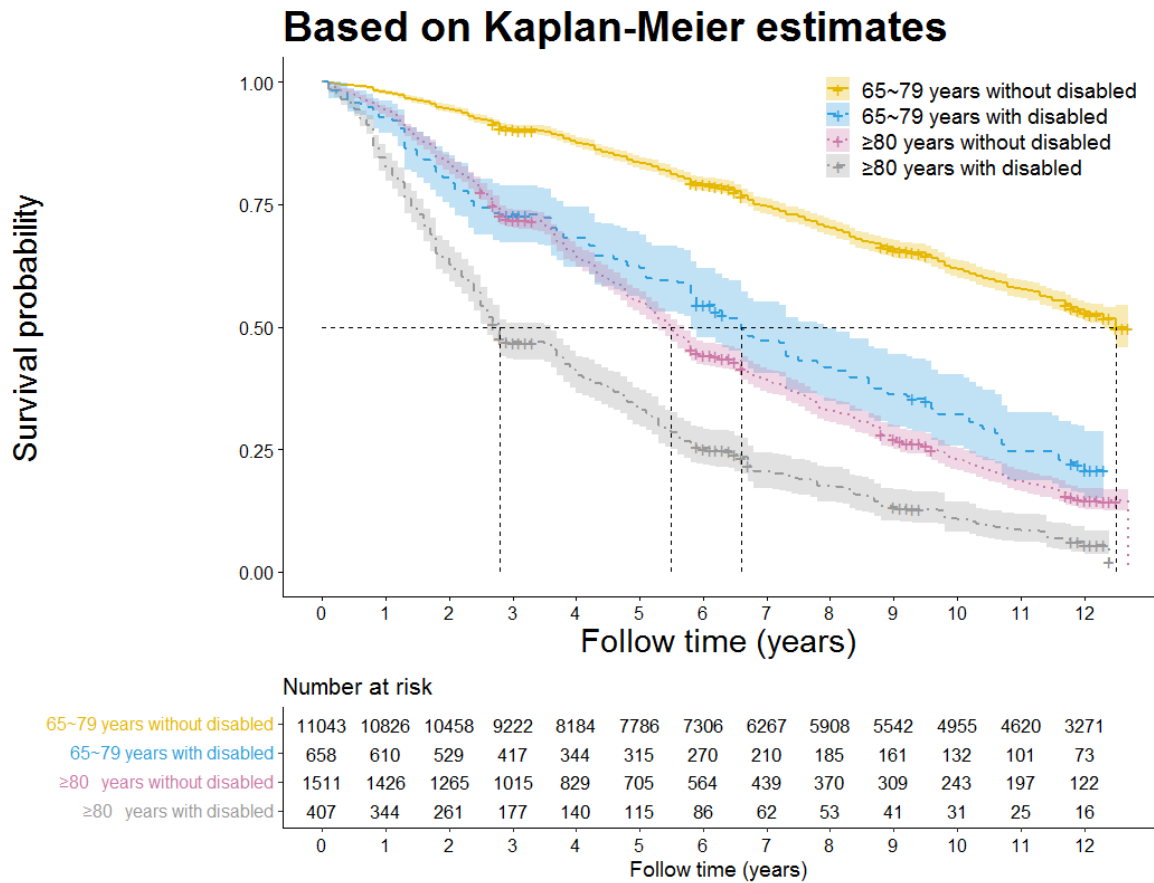

Supplement: MOESM1 [file 19893324]
